# Supplementary material
Source: PubMed Central journal article supplement (PMC2972324)
Supplement: 091729_1.pdf [file 091729_1.pdf]

## Appendix 1 (as submitted by the authors)

### Cochrane

- #1 breast next feed\* (1406)
- #2 MeSH descriptor Breast Feeding, this term only (814)
- #3 (#1 OR #2) (1406)
- #4 peer\* (3914)
- #5 "peer counselling" (26)
- #6 "lay support" (5)
- #7 "volunteer support" (4)
- #8 MeSH descriptor Voluntary Workers, this term only (134)
- #9 peer next support (123)
- #10 MeSH descriptor Peer Group, this term only (402)
- #11 (#4 OR #5 OR #6 OR #7 OR #8 OR #9 OR #10) (4046)
- #12 (#3 AND #11) (99)
- #13 Trials (37)

### MEDLINE

- 1. Breast Feeding/ or breast feed\$.mp. (21688)
- 2. infant feed\$.mp. (2347)
- 3. 1 or 2 (22547)
- 4. exp Voluntary Workers/ (6662)
- 5. social support/ (31337)
- 6. peer\$.mp. (32280)
- 7. peer group/ (8505)
- 8. 4 or 5 or 6 or 7 (68527)
- 9. 3 and 8 (614)
- 10. limit 9 to "therapy (sensitivity)" (124)
- 11. from 10 keep 1-124 (124)

### EMBASE

- 1. Breast Feeding/ or breast feed\$.mp. (10074)
- 2. infant feed\$.mp. (2454)
- 3. 1 or 2 (11326)
- 4. peer counsel\$.mp. (124)
- 5. peer\$.mp. (17982)
- 6. peer counseling/ (55)
- 7. social support/ (14025)
- 8. volunteer/ (10448)
- 9. peer group/ (1074)
- 10. 4 or 5 or 6 or 7 or 8 or 9 (41821)
- 11. 3 and 10 (212)
- 12. limit 11 to "treatment (2 or more terms high sensitivity)" (97)
- 13. from 12 keep 1-97 (97)

### CINAHL (EBSCO)

- 1. peer\* (abstract)
- 2. (or) volunteer\* (abstract)
- 3. (and) breast\* (abstract)
- 4. (and) trial (publication type) (103)

British Nursing Index

1. breast feed\$.mp. (591)
2. peer\$.mp. (514)
3. volunteer\$.mp. (441)
4. lay\$.mp. (423)
5. peer support.mp. (81)
6. volunteer.mp. (164)
7. lay support.mp. (4)
8. peer group.mp. (22)
9. 2 or 3 or 4 or 5 or 6 or 7 or 8 (1359)
10. 1 and 9 (10)
