# Supplementary material
Source: PubMed Central journal article supplement (PMC2972324)
Supplement: 091729_2.pdf [file 091729_2.pdf]

## Appendix 2 (as submitted by the authors)

### Primary Inclusion / Exclusion Form

Author:

Title:

Year:

Ref Man ID:

|                     |                                                                         |   |   |   |
|---------------------|-------------------------------------------------------------------------|---|---|---|
| <b>Study design</b> | Is it an RCT OR non-randomised with concurrent controls?                | Y | N | U |
| <b>Population</b>   | Pregnant women ie antenatal                                             |   |   |   |
| <b>Intervention</b> | Peer support in the antenatal period OR ante and postnatal peer support |   |   |   |
| <b>Comparator</b>   | Clearly described?                                                      |   |   |   |
| <b>Outcome</b>      | Breastfeeding initiation                                                |   |   |   |

Notes
