# Supplementary material
Source: PubMed Central journal article supplement (PMC2972324)
Supplement: 091729_3.pdf [file 091729_3.pdf]

### Appendix 3 (as submitted by the authors): Quality assessment criteria

|                              | High quality                                                                                                                                                                                          | Medium quality                                                                                                                                                                                                        | Low quality                                                                                                                                                                                          |
|------------------------------|-------------------------------------------------------------------------------------------------------------------------------------------------------------------------------------------------------|-----------------------------------------------------------------------------------------------------------------------------------------------------------------------------------------------------------------------|------------------------------------------------------------------------------------------------------------------------------------------------------------------------------------------------------|
| <b>1. Selection bias:</b>    | Studies with randomisation, allocation concealment, similarity of groups at baseline                                                                                                                  | RCTs with some deficiencies in randomisation e.g. lack of allocation concealment, or non-randomised studies with either similarities at baseline or use of statistical methods to adjust for any baseline differences | Non randomised, with obvious differences at baseline, and without analytical adjustment for these differences.                                                                                       |
| <b>2. Performance bias:*</b> | Differed only in intervention, which was adhered to without contamination, groups were similar for co-interventions or statistical adjustment was made for any differences                            | Confounding was possible but some adjustment was made in the analysis                                                                                                                                                 | Intervention was not easily ascertained or groups were treated unequally other than for intervention or there was non-adherence, contamination or dissimilarities in groups and no adjustments made. |
| <b>3. Measurement bias:</b>  | Outcome measured equally in both groups, with adequate length of follow-up (i.e. at least 6 weeks postpartum), direct verification of outcome, with data to allow calculation of precision estimates. | Inadequate length of follow up or length not given                                                                                                                                                                    | Inadequate reporting or verification of maternal mortality or differences in measurement in both groups                                                                                              |
| <b>4. Attrition bias:</b>    | No systematic differences in withdrawals between groups and with appropriate imputation for missing values                                                                                            |                                                                                                                                                                                                                       | Incomplete follow-up data, not intention-to-treat analysis or lacking reporting on attrition                                                                                                         |

\*Blinding was not a quality assessment as blinding of participants or caregivers to intervention types was not possible
